# Supplementary material for: Measures and Penalties for Animal Welfare Violations at German Abattoirs: A Compilation of Current Recommendations and Practices
Source: Animals (Basel). 2023 Sep 14;13(18):2916. doi: 10.3390/ani13182916 (PMC10525597; doi:10.3390/ani13182916)
Supplement: Supplementary file 1 [file animals-13-02916-s001.zip]

Archive with 8 entries (8 files):
- Supplementary Material S1_List of measures and penalties.docx
- Supplementary Material S1_List of measures and penalties.pdf
- Supplementary Material S2_ Online_Survey_English.docx
- Supplementary Material S2_ Online_Survey_English.pdf
- Supplementary Material S3_Online_Survey_German.docx
- Supplementary Material S3_Online_Survey_German.pdf
- Supplementary Material S4_ Semi structure interview with OV.docx
- Supplementary Material S4_ Semi structure interview with OV.pdf
